# Supplementary material for: Ag-based coordination polymer-enhanced photocatalytic degradation of ciprofloxacin and nitrophenol
Source: Royal Society of Chemistry journal article supplement (doi:10.1039/d3dt03727d), 2024-01-01
Supplement: d3dt03727d1.pdf [file d3dt03727d1.pdf]

## Supplementary Information for *Dalton Transactions*

### **Ag-based coordination polymer-enhanced photocatalytic degradation of ciprofloxacin and p-nitrophenol**

Zhihu Ma,<sup>a</sup> Xiaoming Song,<sup>a</sup> Zhaoyu Li,<sup>a</sup> Yixia Ren,<sup>\*a</sup> Jijiang Wang<sup>a</sup> and Yucang Liang<sup>\*b</sup>

<sup>a</sup> Laboratory of New Energy and New Function Materials, Shaanxi Key Laboratory of Chemical Reaction Engineering, College of Chemistry and Chemical Engineering, Yan'an University, Yan'an 716000, China

Email: renyx@yau.edu.cn

<sup>b</sup> Institut für Anorganische Chemie, Eberhard Karls Universität Tübingen, Auf der Morgenstelle 18, 72076 Tübingen, Germany

Email: yucang.liang@uni-tuebingen.de

## Section I

### **Materials and instruments**

AgNO<sub>3</sub> (AR analytical purity) from China Pharmaceutical Group Shanghai Chemical Reagent Company, tri-(4-imidazole phenyl) amine (TIPA) from Jinan Hengchem Ni., Ltd, ethanol, N-N dimethylacetamide (DMA), ethanol (C<sub>2</sub>H<sub>5</sub>OH, AR), N, and N-dimethylformamide (DMF) from Tianjin Comio Chemical Reagent Co. Ltd., p-nitrophenol (BPA), and ciprofloxacin (CIP) from Shanghai Maclean Biochemical Technology Co., *tert*-butanol, ammonium oxalate, and p-benzoquinone (BQ, 99%) from Sinopharm Holding Chemical Reagent Co., were purchased and used without further purification. Deionized water was generated by UPP ultrapure water machine (18.25 MΩ cm<sup>-1</sup> resistivity, 25 °C).

XPS equipment model from Thermo Scientific (USA) was used to calibrate all binding energy values against the C 1s peak at 284.8 eV. The crystal parameters were verified using a Bruker D2 Phase powder X-ray diffractometer (XRD) from Germany. The thermogravimetric analysis was measured on a Hitachi 7200 (Japan). Fluorescence lifetimes were determined by FLS920 steady-state, transient fluorescence spectrometer at room temperature. UV-vis absorption and diffuse reflectance spectra were collected using UV-2550 and UV-2600 220V, CH spectrophotometers, and photocatalytic experiments were performed with XP A-7 in a photochemical reactor from XuJiang, and liquid chromatography-mass spectrometry(LC-MS) coupling using Thermo Fisher Ultimate 3000 UHPLC -Q Exactive was applied to analyze sample compositions. Inductively coupled plasma-optical emission spectroscopy (ICP-OES) was tested using an Agilent 5110 ICP-OES instrument. The samples were centrifuged using a T20 centrifuge. Transient photocurrent electrochemical impedance spectroscopy (EIS) was measured on the CHI660E electrochemical station. Photoluminescence (PL) spectra and fluorescence lifetimes were measured using an F-7100 fluorescence spectrophotometer and an FLS920 steady-state, respectively. Steady-state photoluminescence (PL) spectra, time-resolved PL decay curves, and lifetimes of photogenerated electrons were detected. The excitation

wavelength of all luminescence measurements was 482 nm, and the filter was 420 nm. The Chennai CHI600E electrochemical workstation was used to measure the electrochemical impedance spectra (EIS) and photocurrent signals. The Ag/AgCl electrode was used as the reference electrode, and the platinum wire as the counter electrode. The working electrode was prepared by coating photocatalyst onto indium tin oxide (ITO), and 0.5 M Na<sub>2</sub>SO<sub>4</sub> aqueous solution was chosen as the electrolyte. The bias potential was controlled at -0.5 V. A xenon lamp light source (> 420 nm) was used as the visible light source. 5 mg of catalyst particles were added to 1 mL of ethanol and 1 mL of water solution under sonication for 2 h. The coated films were obtained at 2 × 2 cm by pipetting 2 mL of the mixture onto the ITO glass surface in portions.

### Crystal structure determination

Single crystal X-ray diffraction analysis of Ag-TIPA was performed on a Bruker SMART APEX CCD diffractometer equipped with graphite monochromatic Mo K $\alpha$  radiation ( $\lambda = 0.71073 \text{ \AA}$ ). All data were integrated with SAINT and corrected for multiple scan absorption using SADABS. The structure was solved using the direct method of SHELXT and refined by SHELXL-2018 for F<sup>2</sup> by full matrix least squares. All non-hydrogen atoms were anisotropically refined. The hydrogen atoms were set at the calculated positions, and the crystal structures were plotted using Diamond 3.1 software. The crystallographic data of Ag-TIPA are provided in Table S1, and the selected bond lengths and angles are shown in Table S2.

## Section II

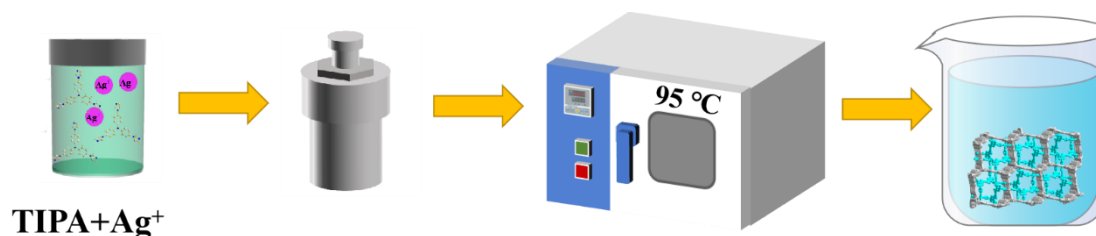

**Scheme S1.** The preparation of Ag-TIPA.

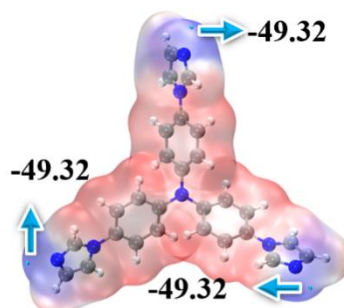

**Fig. S1** The electrostatic potential of TIPa.

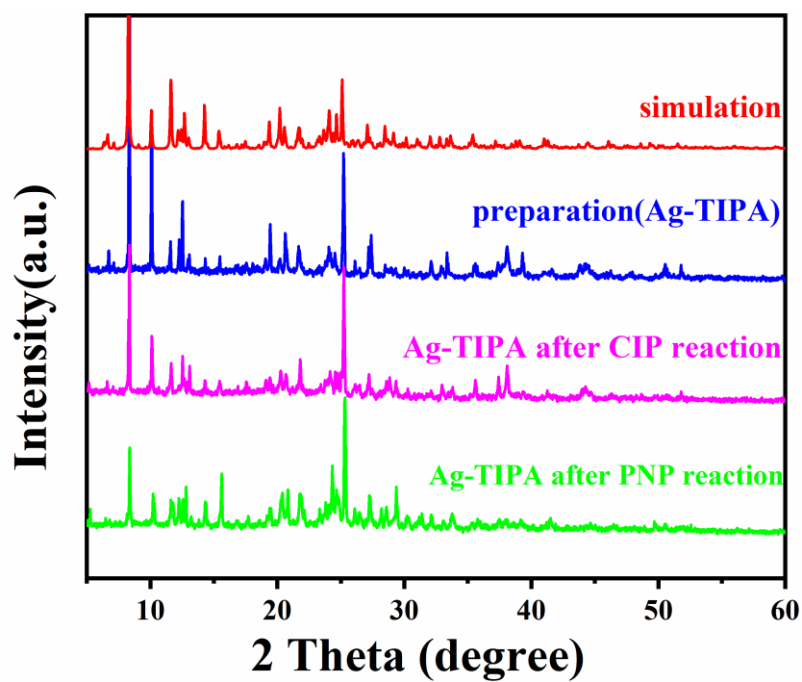

**Fig. S2** A comparison of PXRD patterns between Ag-TIPA before and after catalysis and simulation curve.

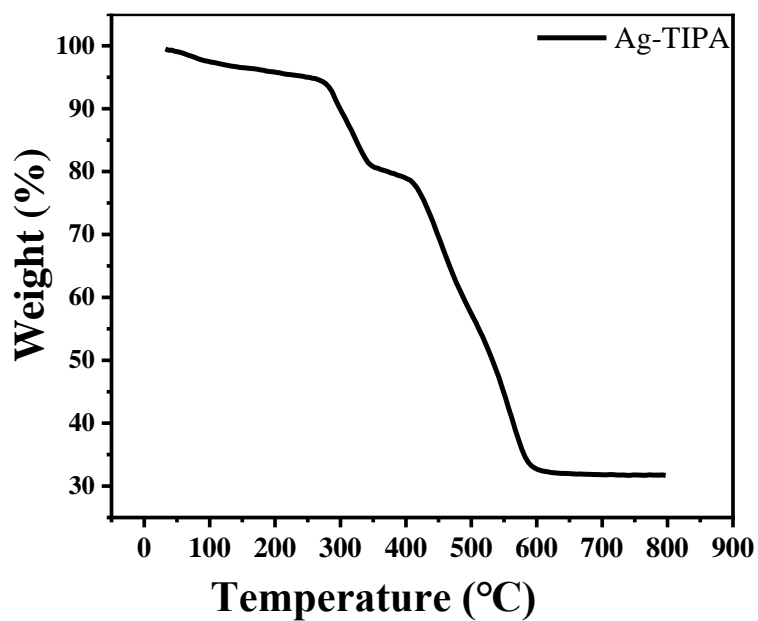

**Fig. S3** Thermogravimetric curve of Ag-TIPA.

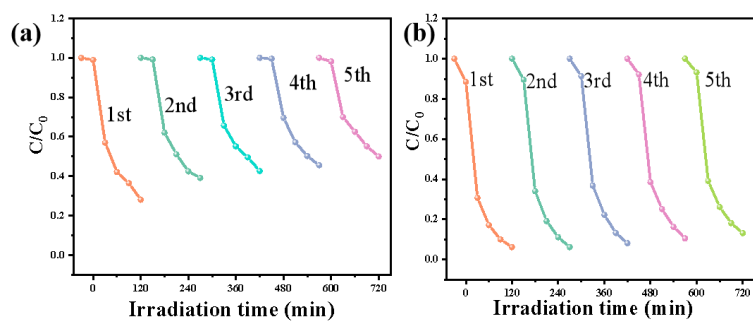

**Fig. S4** The photocatalytic degradation of CIP catalyzed by (a) TIPA and (b) Ag-TIPA for five runs.

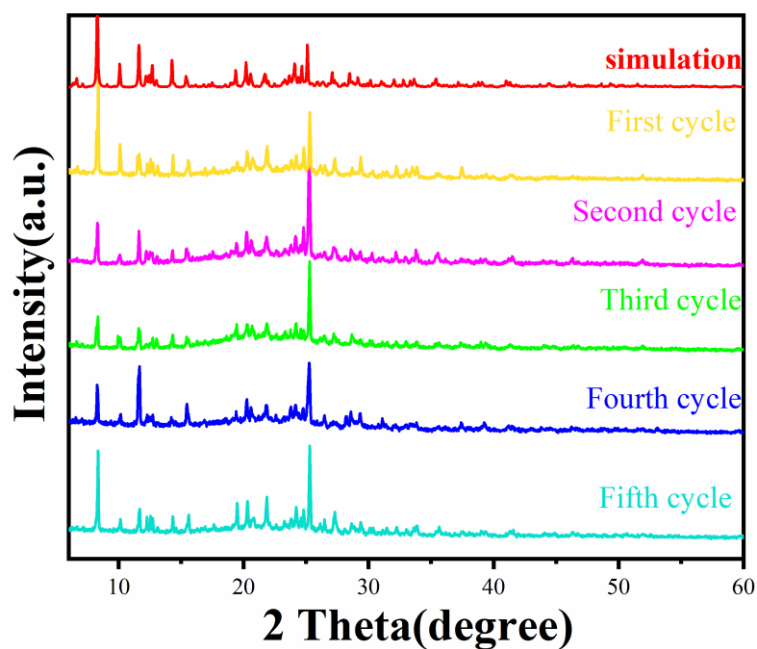

**Fig. S5** A comparison of PXRD patterns of Ag-TIPA after every catalytic run for the degradation of CIP.

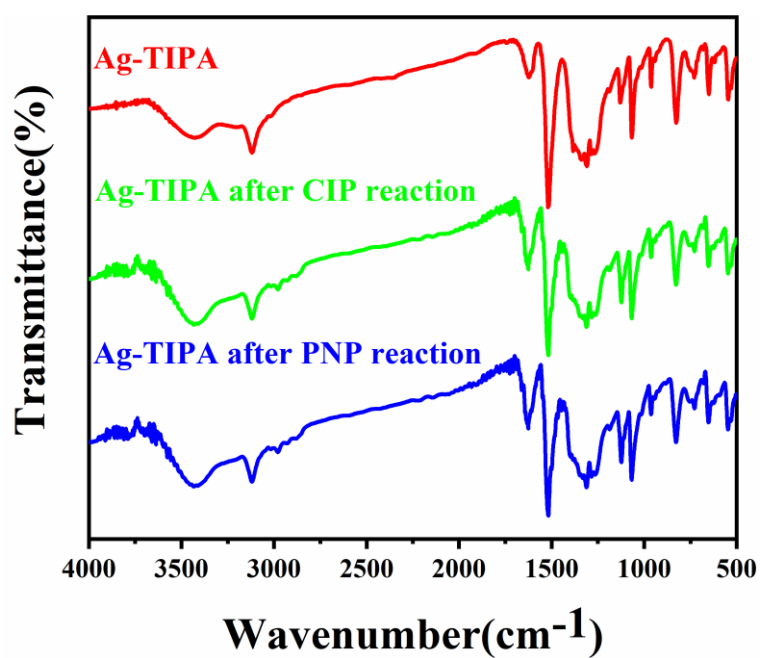

**Fig. S6** FT-IR spectra of Ag-TIPA before and after catalysis.

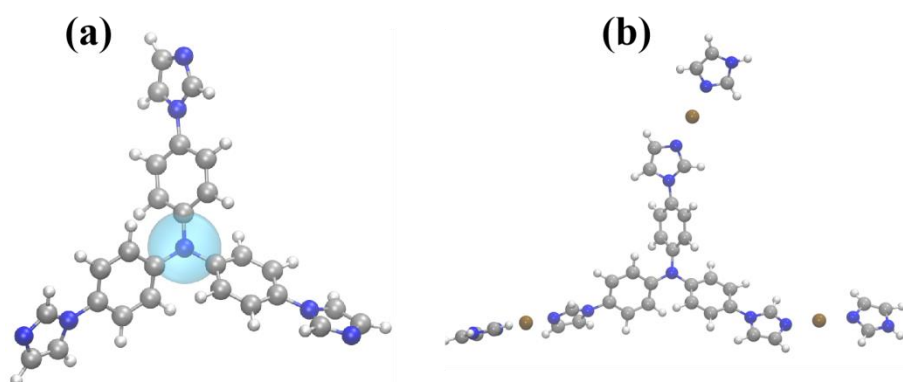

**Fig. S7** Electron-hole DFT calculation model for (a) TIPA and (b) Ag-TIPA.

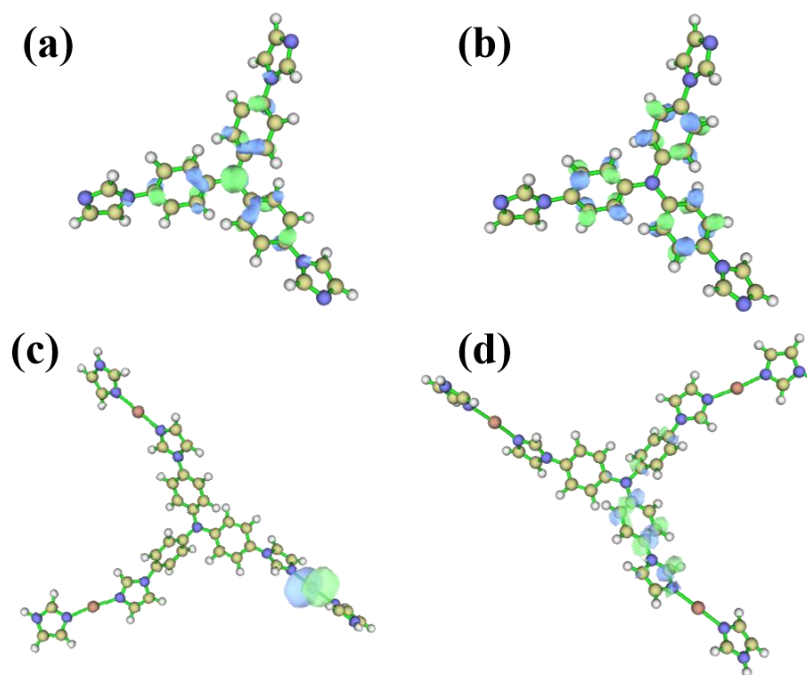

**Fig. S8** (a) HOMO and (b) LUMO of TIPA; (c) HOMO and (d) LUMO of Ag-TIPA.

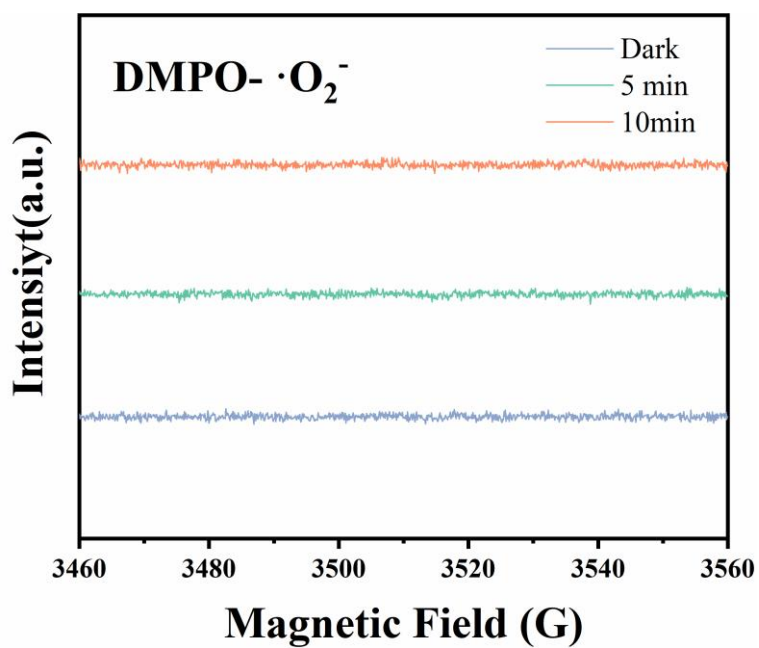

**Fig. S9** ESR spectra of Ag-TIPA for DMPO- $\cdot\text{O}_2^-$  in the dark and under UV-visible light irradiation.

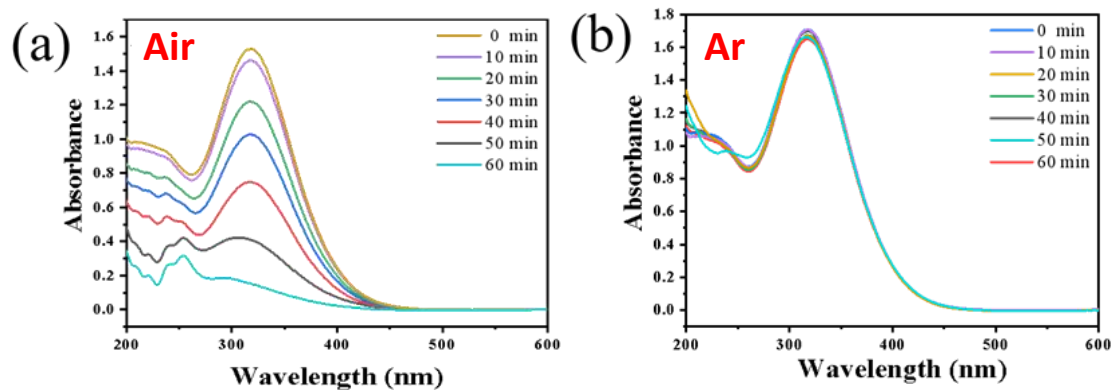

**Fig. S10** (a) UV/Vis absorption spectrum of Ce(IV) with treatment of Ag-TIPA for  $\text{H}_2\text{O}_2$  production in air. (b) UV/Vis absorption spectrum of Ce(IV) with treatment of Ag-TIPA for  $\text{H}_2\text{O}_2$  production in argon protection.

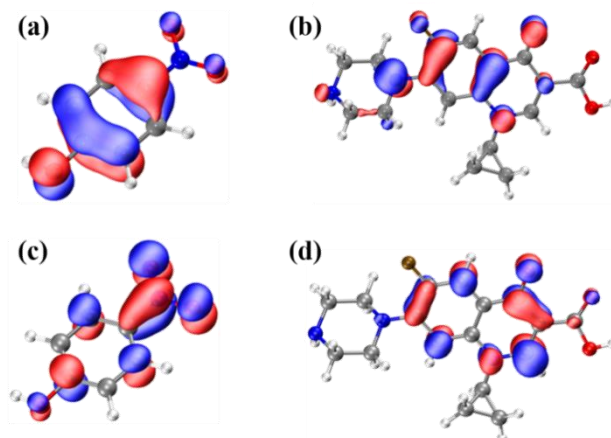

**Fig. S11** HOMO of (a) PNP and (b) CIP; LUMO of (c) PNP and (d) CIP.

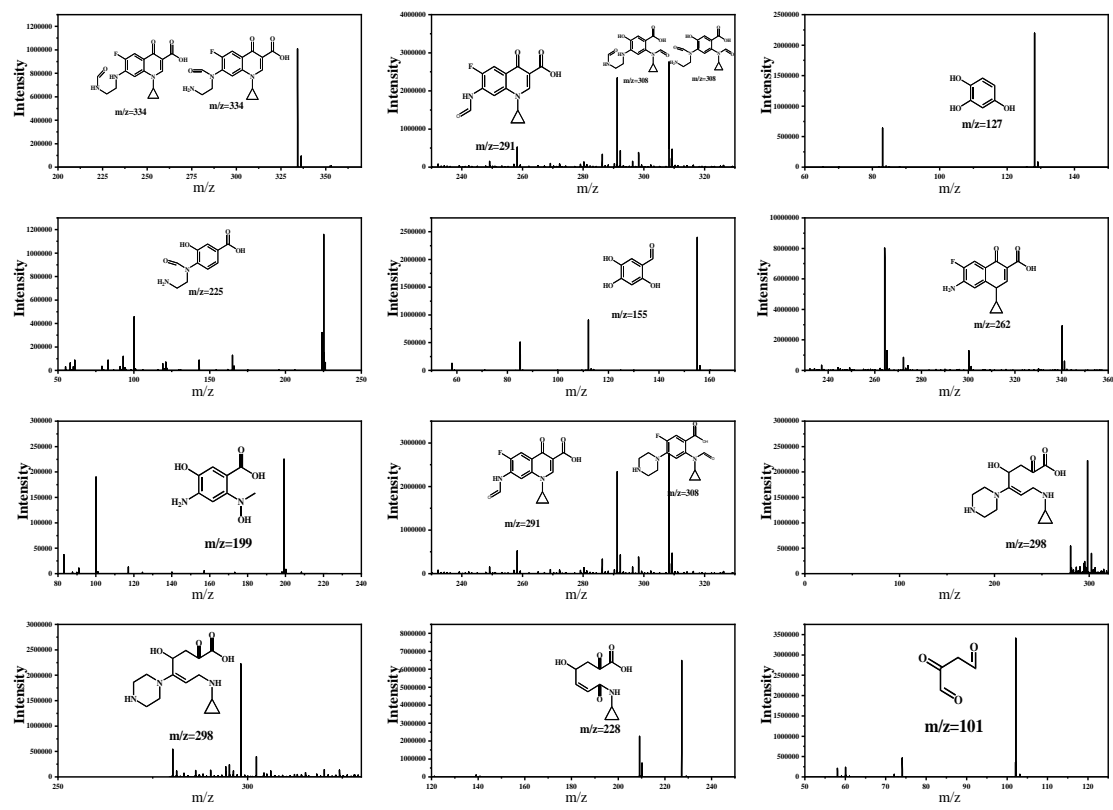

**Fig. S12** Mass spectra of intermediates during ciprofloxacin degradation.



**Table S1.** Crystallographic data for Ag-TIPA.

| Coordination polymer                  | Ag-TIPA                          |
|---------------------------------------|----------------------------------|
| Formula                               | $C_{162}H_{126}Ag_9N_{51}O_{27}$ |
| Formula weight                        | 4189.96                          |
| Temperature                           | 296.15 K                         |
| Crystal system                        | orthorhombic                     |
| Space group                           | <i>-P 2ab 2bc</i>                |
| <i>a</i> (Å)                          | 15.2521(9)                       |
| <i>b</i> (Å)                          | 27.1930(18)                      |
| <i>c</i> (Å)                          | 34.360(2)                        |
| $\alpha$ (°)                          | 90                               |
| $\beta$ (°)                           | 90                               |
| $\gamma$ (°)                          | 90                               |
| <i>V</i> (Å <sup>3</sup> )            | 14250.8(15)                      |
| <i>Z</i>                              | 3                                |
| Goof                                  | 1.033                            |
| R indices [ <i>I</i> >2σ( <i>I</i> )] | $R_1 = 0.0671$ , $wR_2 = 0.1762$ |
| R indices (all data)                  | $R_1 = 0.1032$ , $wR_2 = 0.2038$ |

**Table S2.** Bond lengths and bond angles of Ag-TIPA.

| Bond lengths | [Å]       | Bond angles      | [°]       |
|--------------|-----------|------------------|-----------|
| Ag(01)-N51#1 | 2.101(5)  | N51#1-Ag(01)-N11 | 175.2(2)  |
| Ag(01)-N11   | 2.104(5)  | N12-Ag(02)-N71   | 178.9(2)  |
| Ag(02)-N12   | 2.105(6)  | N52-Ag(03)-N72#2 | 175.4(3)  |
| Ag(02)-N71   | 2.108(5)  | C163-N53-Ag(04)  | 117.0(9)  |
| Ag(03)-N52   | 2.095(6)  | C173-N53-Ag(04)  | 138.6(9)  |
| Ag(03)-N72#2 | 2.095(5)  | C13-N13-Ag(05)   | 118.5(13) |
| Ag(04)-N53   | 2.258(14) | C23-N13-Ag(05)   | 132.4(15) |
| Ag(05)-N13   | 2.136(18) |                  |           |

**Table S3.** ICP-MS analytic data from the solution of Ag-TIPA-catalyzed CIP degradation after fifth cycle.

| Number of samples                                                                   | Ag-TIPA |
|-------------------------------------------------------------------------------------|---------|
| Sample volume V (mL)                                                                | 5       |
| Constant volume $V_o$ (mL)                                                          | 10      |
| Test element                                                                        | Ag      |
| Test solution element concentration $C_o$ (mg/L)                                    | 0.000   |
| Dilution ratio                                                                      | 2       |
| Elemental concentration $C_1$ in the original solution of digestion solution (mg/L) | 0       |
| Elemental content $C_x$ in test sample (mg/L)                                       | 0.0     |

**Table S4.** A comparison on photodegradation efficiency among the present study and previous reports.

| Pollutant (mg/L) | Photocatalyst (g L <sup>-1</sup> )                         | Light source | Reaction time (min) | Degradation % | Rate constant | Ref.      |
|------------------|------------------------------------------------------------|--------------|---------------------|---------------|---------------|-----------|
| CIP              | Ag-TIPA (1.0)                                              | UV light     | 120                 | 94            | 0.023         | this work |
| PNP              |                                                            |              | 75                  | 96            | 0.043         |           |
| P-NP             | Graphene/ZnO (1.0)                                         | UV light     | 180                 | 95            | 0.016         | [1]       |
| P-NP             | rGO/ZrO <sub>2</sub> /Ag <sub>3</sub> PO <sub>4</sub>      | UV light     | 90                  | 98.3          | 0.043         | [2]       |
| P-NP             | ZnO-NCP (0.25)                                             | UV light     | 180                 | 60            | 0.005         | [3]       |
| P-NP             | Ln-doped ZnO (1.0)                                         | UV light     | 195                 | 81.63         | 0.008         | [4]       |
| P-NP             | ZnO (1.5)                                                  | UV light     | 90                  | 97.7          | 0.038         | [5]       |
| P-NP             | Ag-ZnO (2.0)                                               | UV light     | 180                 | 100           | 0.039         | [6]       |
| P-NP             | CuO/ZnO                                                    | Sunlight     | 180                 | 85            | 0.010         | [7]       |
| P-NP             | CeO <sub>2</sub> /ZnO (1.5)                                | UV light     | 200                 | 95            | 0.015         | [8]       |
| IP               | Fe-MOF@BiOBr/<br>M-CN-50 (0.625)                           | Xe lamp      | 120                 | 93            | 0.022         | [9]       |
| CIP              | 0D/2D WS <sub>2</sub> /BiOBr (1.0)                         | Xe lamp      | 100                 | 92            | 0.025         | [10]      |
| CIP              | BiOAc/BiOBr (0.5)                                          | LED light    | 120                 | 85            | 0.022         | [11]      |
| CIP              | La <sup>3+</sup> -2D-g-C <sub>3</sub> N <sub>4</sub> (1.0) | UVA light    | 400                 | 93            | 0.006         | [12]      |

**Table S5.** Electron and hole analysis index for TIPA and Ag-TIPA.

| <b>S0-S1</b> | <b>D (Å)</b> | <b>T (Å)</b> | <b>H (Å)</b> | <b><math>\Delta\sigma</math> (Å)</b> | <b>Sm (a.u.)</b> | <b>Sr (a.u.)</b> | <b>HDI</b> | <b>EDI</b> |
|--------------|--------------|--------------|--------------|--------------------------------------|------------------|------------------|------------|------------|
| TPA          | 0.014        | -0.981       | 3.428        | -0.001                               | 0.3688           | 0.6357           | 9.32       | 5.60       |
| Ag-TPA       | 4.406        | 2.034        | 3.746        | 1.526                                | 0.17643          | 0.38815          | 4.60       | 5.52       |
| <b>S0-S2</b> | <b>D (Å)</b> | <b>T (Å)</b> | <b>H (Å)</b> | <b><math>\Delta\sigma</math> (Å)</b> | <b>Sm (a.u.)</b> | <b>Sr (a.u.)</b> | <b>HDI</b> | <b>EDI</b> |
| TPA          | 1.476        | -1.071       | 3.622        | 0.294                                | 0.3918           | 0.6592           | 9.46       | 6.37       |
| Ag-TPA       | 2.091        | -0.980       | 4.120        | 0.690                                | 0.31878          | 0.61195          | 4.31       | 4.38       |
| <b>S0-S3</b> | <b>D (Å)</b> | <b>T (Å)</b> | <b>H (Å)</b> | <b><math>\Delta\sigma</math> (Å)</b> | <b>Sm (a.u.)</b> | <b>Sr (a.u.)</b> | <b>HDI</b> | <b>EDI</b> |
| TPA          | 1.470        | -0.928       | 3.621        | 0.293                                | 0.4031           | 0.6681           | 9.46       | 6.37       |
| Ag-TPA       | 2.657        | -0.198       | 3.689        | 1.829                                | 0.27439          | 0.54673          | 4.46       | 4.28       |

**Table S6.** Fukui Index and Orbital weight double descriptor values for PNP.

| Atom index | OW f <sup>+</sup> | OW f <sup>-</sup> | OW fo   | OW DD    |
|------------|-------------------|-------------------|---------|----------|
| C1         | 0.04438           | 0.11452           | 0.07945 | -0.07014 |
| C2         | 0.08042           | 0.10361           | 0.09201 | -0.02319 |
| C3         | 0.04454           | 0.10775           | 0.07615 | -0.06321 |
| C4         | 0.08808           | 0.07495           | 0.08151 | 0.01313  |
| C5         | 0.07022           | 0.13304           | 0.10163 | -0.06281 |
| C6         | 0.08306           | 0.17180           | 0.07743 | 0.01126  |
| H7         | 0.00391           | 0.00835           | 0.00613 | -0.00444 |
| H8         | 0.00399           | 0.00783           | 0.00591 | -0.00384 |
| H9         | 0.00981           | 0.00572           | 0.00776 | 0.00409  |
| H10        | 0.00917           | 0.00541           | 0.00729 | 0.00377  |
| N11        | 0.19964           | 0.03128           | 0.11546 | 0.16835  |
| O12        | 0.16794           | 0.10967           | 0.13881 | 0.05827  |
| O13        | 0.16680           | 0.11025           | 0.13853 | 0.05655  |
| O14        | 0.02567           | 0.10922           | 0.06744 | -0.08354 |
| H15        | 0.00228           | 0.00653           | 0.00440 | -0.00426 |

**Table S7.** Fukui Index and Orbital weight double descriptor values for CIP.

| Atom index | OW f <sup>+</sup> | OW f <sup>-</sup> | OW fo   | OW DD    |
|------------|-------------------|-------------------|---------|----------|
| C1         | 0.05686           | 0.03558           | 0.04622 | 0.02128  |
| N2         | 0.05118           | 0.04909           | 0.05014 | 0.00209  |
| C3         | 0.14014           | 0.02074           | 0.08044 | 0.11940  |
| C4         | 0.06968           | 0.06159           | 0.06564 | 0.00809  |
| C5         | 0.07994           | 0.03247           | 0.05620 | 0.04747  |
| C6         | 0.06612           | 0.06364           | 0.06488 | 0.00249  |
| O7         | 0.01132           | 0.01042           | 0.01087 | 0.00089  |
| C8         | 0.05024           | 0.01298           | 0.03161 | 0.03726  |
| C9         | 0.07485           | 0.03043           | 0.05264 | 0.04443  |
| C10        | 0.05436           | 0.05144           | 0.05290 | 0.00292  |
| C11        | 0.07536           | 0.03759           | 0.05647 | 0.03778  |
| C12        | 0.06322           | 0.04598           | 0.05460 | 0.01724  |
| N13        | 0.01881           | 0.10036           | 0.05958 | -0.08155 |
| C14        | 0.00327           | 0.02101           | 0.01214 | -0.01774 |
| C15        | 0.00639           | 0.02273           | 0.01456 | -0.01634 |
| C16        | 0.00095           | 0.01456           | 0.00776 | -0.01361 |
| N17        | 0.00047           | 0.09058           | 0.04552 | -0.09010 |
| C18        | 0.00111           | 0.01537           | 0.00824 | -0.01426 |
| F19        | 0.00874           | 0.01737           | 0.01306 | -0.00863 |
| C20        | 0.00798           | 0.00633           | 0.00715 | 0.00165  |
| O21        | 0.06412           | 0.15154           | 0.10783 | -0.08742 |
| O22        | 0.03965           | 0.04557           | 0.04261 | -0.00592 |
| C23        | 0.00314           | 0.00442           | 0.00378 | -0.00129 |
| C24        | 0.00303           | 0.00199           | 0.00251 | 0.00104  |
| H25        | 0.01529           | 0.00201           | 0.00865 | 0.01328  |
| H26        | 0.00098           | 0.00110           | 0.00104 | -0.00013 |
| H27        | 0.00789           | 0.00325           | 0.00557 | 0.00463  |
| H28        | 0.0067            | 0.0039            | 0.0053  | 0.00280  |
| H29        | 0.00133           | 0.00273           | 0.00203 | -0.00140 |
| H30        | 0.00154           | 0.00892           | 0.00523 | -0.00738 |
| H31        | 0.00235           | 0.00953           | 0.00594 | -0.00717 |
| H32        | 0.00108           | 0.00284           | 0.00196 | -0.00176 |
| H33        | 0.00027           | 0.00181           | 0.00104 | -0.00154 |
| H34        | 0.00025           | 0.00310           | 0.00168 | -0.00285 |
| H35        | 0.00047           | 0.00692           | 0.00370 | -0.00645 |
| H36        | 0.00053           | 0.00206           | 0.00129 | -0.00152 |
| H37        | 0.00031           | 0.00311           | 0.00171 | -0.00280 |
| H38        | 0.00422           | 0.00338           | 0.00380 | 0.00084  |
| H39        | 0.00129           | 0.00042           | 0.00085 | 0.00087  |
| H40        | 0.00148           | 0.00064           | 0.00106 | 0.00084  |
| H41        | 0.00078           | 0.00021           | 0.00049 | 0.00057  |
| H42        | 0.00239           | 0.00034           | 0.00136 | 0.00205  |

**Table S8.** Target ion information table of CIP.

| intermediate species                                           | structural formula | appearance time | relative molecular mass M | anion [M+H] |
|----------------------------------------------------------------|--------------------|-----------------|---------------------------|-------------|
| C <sub>16</sub> H <sub>16</sub> FN <sub>3</sub> O <sub>4</sub> |                    | 11.32           | 333                       | 334         |
| C <sub>16</sub> H <sub>16</sub> FN <sub>3</sub> O <sub>4</sub> |                    | 11.32           | 333                       | 334         |
| C <sub>14</sub> H <sub>17</sub> FN <sub>3</sub> O <sub>5</sub> |                    | 13.53           | 307                       | 308         |
| C <sub>14</sub> H <sub>17</sub> FN <sub>3</sub> O <sub>5</sub> |                    | 13.53           | 307                       | 308         |
| C <sub>10</sub> H <sub>12</sub> N <sub>2</sub> O <sub>4</sub>  |                    | 11.32           | 224                       | 225         |
| C <sub>7</sub> H <sub>6</sub> O <sub>4</sub>                   |                    | 10.01           | 154                       | 155         |
| C <sub>6</sub> H <sub>6</sub> O <sub>3</sub>                   |                    | 12.25           | 126                       | 127         |
| C <sub>14</sub> H <sub>12</sub> FNO <sub>3</sub>               |                    | 10.01           | 261                       | 262         |
| C <sub>8</sub> H <sub>10</sub> N <sub>2</sub> O <sub>4</sub>   |                    | 10.91           | 198                       | 199         |
| C <sub>15</sub> H <sub>18</sub> FN <sub>3</sub> O <sub>3</sub> |                    | 13.53           | 307                       | 308         |
| C <sub>14</sub> H <sub>23</sub> N <sub>3</sub> O <sub>4</sub>  |                    | 9.19            | 297                       | 298         |
| C <sub>10</sub> H <sub>13</sub> NO <sub>5</sub>                |                    | 1.43            | 227                       | 228         |
| C <sub>4</sub> H <sub>4</sub> O <sub>3</sub>                   |                    | 15.91           | 100                       | 101         |

**Table S9.** Target ion information table of PNP.

| intermediate species | structural formula                                                                  | appearance time | relative molecular mass M | anion [M+H] |
|----------------------|-------------------------------------------------------------------------------------|-----------------|---------------------------|-------------|
| p-nitrophenol        | 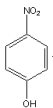   | 1.68            | 139.03                    | 138.02      |
| maleic acid          |    | 1.69            | 116.01                    | 115.00      |
| oxalic acid          |    | 1.9             | 90.00                     | 89.02       |
| nitrobenzene         |    | 1.87            | 123.03                    | 122.02      |
| dinitrophenol        |    | 2.15            | 184.01                    | 183.00      |
| pyruvic acid         |    | 2.01            | 88.02                     | 87.00       |
| hydroquinone         |  | 3.4             | 154.02                    | 154.01      |
| p-pyrocatechol       |  | 4.92            | 110.00                    | 109.01      |
| nitric acid          |  | 1.80            | 63                        | 61.99       |
| acetic acid          |  | 1.96            | 60.05                     | 59.01       |

## References

1. D. Kale, P. Thakur, *J. Porous Mater.*, 2015, **22**, 797-806.
2. H. Anwer, J.-W. Park, *J. Hazard. Mater.*, 2018, **358**, 416-426.
3. A. Nezamzadeh-Ejhi, S. Khorsandi, *J. Ind. Eng. Chem.*, 2014, **20**, 937-946.
4. M. Khatamian, A. A. Khandar, B. Divband, M. Haghighi, S. Ebrahimi, *J. Mol. Catal. A Chem.*, 2012, **365**, 120-127.
5. D. Rajamanickam, M. Shanthi, *Arab. J. Chem.*, 2016, **9**, S1858-S1868.
6. B. Divband, M. Khatamian, G. R. K. Eslamian, M. Darbandi, *Appl. Surf. Sci.*, 2013, **284**, 80-86.
7. M. T. Qamar, M. Aslam, I. M. I. Ismail, N. Salah, A. Hameed, *ACS Appl. Mater. Interfaces*, 2015, **7**, 8757-8769.
8. K. Negi, M. Kumar, M. S. Chauhan, *Mater. Chem. Phys.*, 2019, **226**, 59-65.
9. Y. Pan, X. Hu, D. Shen, Z. Li, R. Chen, Y. Li, J. Lu, M. Bao, *Sep. Purif. Technol.*, 2022, **295**, 121216.
10. S. Fu, W. Yuan, X. Liu, Y. Yan, H. Liu, L. Li, F. Zhao, J. Zhou, *J. Colloid Interface Sci.*, 2020, **569**, 150-163.
11. H. Liu, B. Wang, M. Chen, H. Zhang, J. Peng, L. Ding, W. Wang, *Sep. Purif. Technol.*, 2021, **261**, 118286.
12. S. K. Kuila, D. K. Gorai, B. Gupta, A. K. Gupta, C. S. Tiwary, T. K. Kundu, *Chemosphere*, 2021, **268**, 128780.
